# Supplementary material for: Bioactivity of compounds secreted by symbiont bacteria of Nudibranchs from Indonesia
Source: PeerJ. 2020 Jan 2;8:e8093. doi: 10.7717/peerj.8093 (PMC6942679; doi:10.7717/peerj.8093)
Supplement: Supplemental Information 8 [file peerj-08-8093-s008.xls]

## Sheet: resultats
		RESULTATS
		Essai 1				Essai 2
		CC 50 %	1	µg.ml-1		CC 50 %	2192.55	µg.ml-1
		EC 50%	1	µg.ml-1		EC 50%	1.32556e+08	µg.ml-1
		Zovirax				Zovirax
		CC 50 %	1	µg.ml-1		CC 50 %	0.0199526	µg.ml-1
		EC 50%	1	µg.ml-1		EC 50%	0.272427	µg.ml-1

## Sheet: saisie2
Toxicité	T µg/ml													ZOVIRAX					Témoin cellules	Témoin virus
[ ]	1000	500	100	50	5	10	5	1	0.5	0.1	0.05			1	0.5	0.1	0.05		2.1285	0.2782
	0.6253	1.2124	1.0132	1.2384	1.9319									2.0327	2.0491	2.0984	2.0419
	0.602	0.7984	0.8719	1.1151	1.9313									2.1162	1.9863	2.0224	1.9184
	0.6809	0.6687	0.8606	1.067	1.7155									2.076	1.991	2.0085	1.7455
	0.5615	0.7018	0.8739	1.0171	1.6426									2.1417	2.0102	1.91	1.7048
moyenne	0.617425	0.845325	0.9049	1.1094	1.80532									2.09165	2.00915	2.00983	1.85265
% destruction	0.709925	0.602854	0.574865	0.478788	0.151832									0.0173127	0.0560724	0.0557552	0.129598
[ ]	200	150	100	50	25	10	5	1	0.5	0.1	0.05			1	0.5	0.1	0.05
log [ ]	2.30103	2.17609	2	1.69897	1.39794									0	-0.30103	-1	-1.30103		2.1285	0.2782
Activité	T µg/ml
[ ]	1000	500	100	50	5	10	5	1	0.5	0.1	0.05			1	0.5	0.1	0.05
	0.6147	0.6708	0.3362	0.3028	0.3044									1.8999	1.6409	1.4358	0.3575
	0.6102	0.6948	0.393	0.3328	0.329									1.8529	1.6291	1.4802	0.4648
	0.624	0.7881	0.3808	0.4149	0.3681									1.9514	1.7334	1.5847	0.4669
	0.6084	0.8236	0.4579	0.4375	0.4641									1.9243	1.8317	1.8563	0.4018
moyenne	0.614325	0.744325	0.391975	0.372	0.3664									1.90712	1.70878	1.58925	0.42275
% protection	0.990862	0.821909	0.181546	0.112849	0.0577556									0.898246	0.826468	0.757121	0.0918098
[ ]	200	150	100	50	25	10	5	1	0.5	0.1	0.05			1	0.5	0.1	0.05
log [ ]	2.30103	2.17609	2	1.69897	1.39794									0	-0.30103	-1	-1.30103

## Sheet: cc essai 1
Toxicité	[ ]	% destruction	log [ ]
200µg/ml	200
150µg/ml	150
100µg/ml	100
50µg/ml	50
25µg/ml	25
10µg/ml	10
5µg/ml	5
				saisie des coefficients
				y = a x + b
				a
				b
				CC 50 % essai 1
				1	µg/ml

## Sheet: ec essai 1
Activité	[ ]	% protection	log [ ]
200µg/ml	200
150µg/ml	150
100µg/ml	100
50µg/ml	50
25µg/ml	25
10µg/ml	10
5µg/ml	5
				saisie des coefficients
				y = a x + b
				a
				b
				EC 50 % essai 1
				1	µg/ml

## Sheet: cc zovirax
Toxicité	[ ]	% destruction	log [ ]
1 µg/ml	1
0,5 µg/ml	0.5
0,1 µg/ml	0.1
0,05 µg/ml	0.05
						saisie des coefficients
						y = a x + b
						a
						b
						CC 50 % zovirax
						1	µg/ml

## Sheet: ec zovirax
Activité	[ ]	% destruction	log [ ]
1 µg/ml	1
0,5 µg/ml	0.5
0,1 µg/ml	0.1
0,05 µg/ml	0.05
						saisie des coefficients
						y = a x + b
						a
						b
						EC 50 % zovirax
						1	µg/ml

## Sheet: cc essai 2
Toxicité	[ ]	% destruction	log [ ]
200µg/ml	200	0.45	3.3
150µg/ml	150	0.602854	2.17609
100µg/ml	100	0.574865	2
50µg/ml	50	0.478788	3.17
25µg/ml	25	0.151832	1.39794
10µg/ml	10		3
5µg/ml	5		2.69
1 µg/ml	1		2.39
0,5 µg/ml	0.5
0,1 µg/ml	0.1
0,05 µg/ml	0.05
				saisie des coefficients
				y = a x + b
				a	1.1979
				b	2.742
				CC 50 % essai 2
				2192.55	µg/ml

## Sheet: cc zovirax 2
Toxicité	[ ]	% destruction	log [ ]
1 µg/ml	1	0.0173127	0
0,5 µg/ml	0.5	0.0560724	-0.30103
0,1 µg/ml	0.1	0.0557552	-1
0,05 µg/ml	0.05	0.129598	-1.30103
						saisie des coefficients
						y = a x + b
						a	-3.5
						b	0.05
						CC 50 % zovirax
						0.0199526	µg/ml

## Sheet: ec zovirax 2
Activité	[ ]	% destruction	log [ ]
1 µg/ml	1	0.898246	0
0,5 µg/ml	0.5	0.826468	-0.30103
0,1 µg/ml	0.1	0.757121	-1
0,05 µg/ml	0.05	0.0918098	-1.30103
						saisie des coefficients
						y = a x + b
						a	1.4371
						b	-1.2833
						EC 50 % zovirax
						0.272427	µg/ml

## Sheet: ec essai 2
Activité	[ ]	% destruction	log [ ]
200µg/ml	200	0.990862	2.30103
150µg/ml	150	0.821909	2.17609
100µg/ml	100	0.181546	2
50µg/ml	50	0.112849	1.69897
25µg/ml	25	0.0577556	1.39794
10µg/ml	10
5µg/ml	5
1 µg/ml	1
0,5 µg/ml	0.5
0,1 µg/ml	0.1
0,05 µg/ml	0.05
				saisie des coefficients
				y = a x + b
				a	12.809
				b	1.7179
				EC 50 % essai 2
				1.32556e+08	µg/ml

[truncated: 1 more sheets: saisie]
